# Supplementary material for: DNA methylation profiling allows for characterization of atrial and ventricular cardiac tissues and hiPSC-CMs
Source: PubMed Central journal article supplement (PMC6560887; doi:10.1186/s13148-019-0679-0), 2019-06-11
Supplement: 13148_2019_679_MOESM2_ESM.pdf [file 13148_2019_679_MOESM2_ESM.pdf]

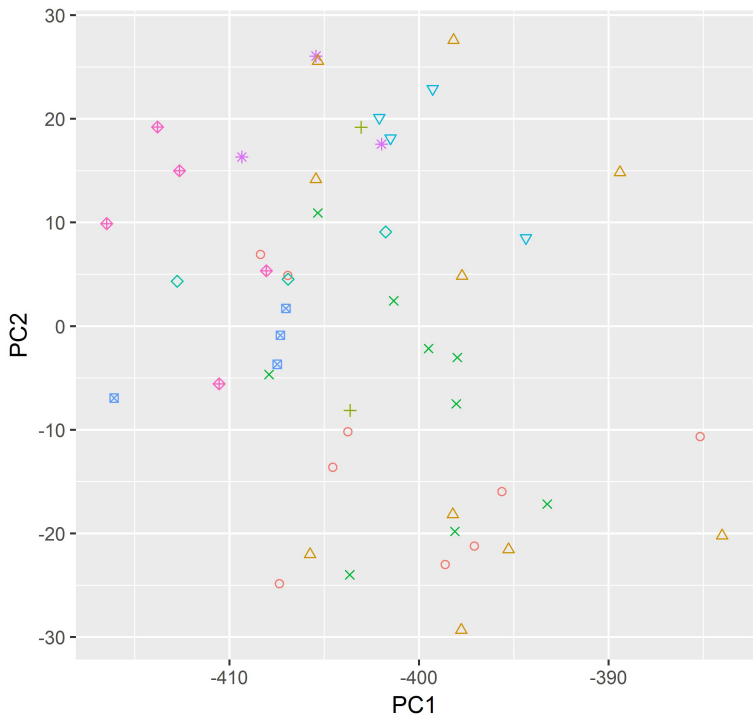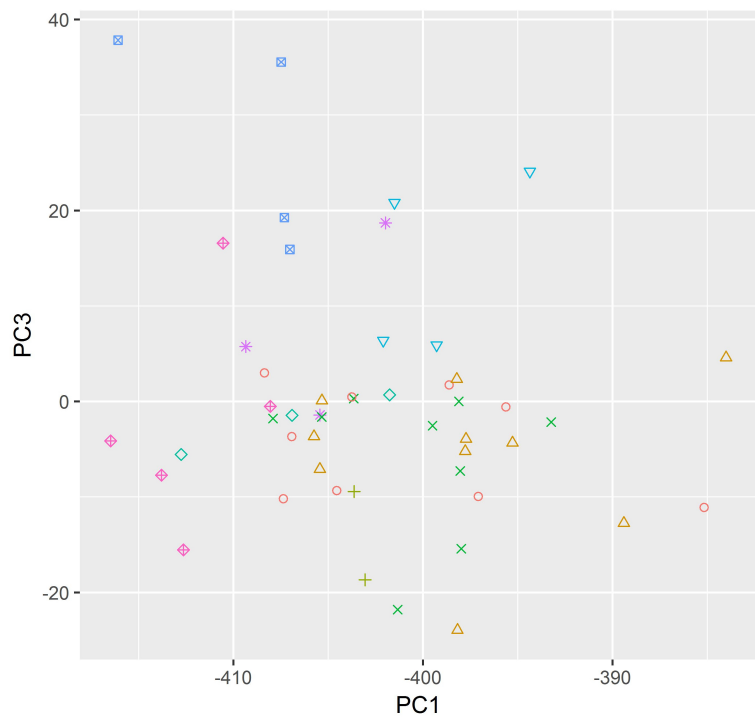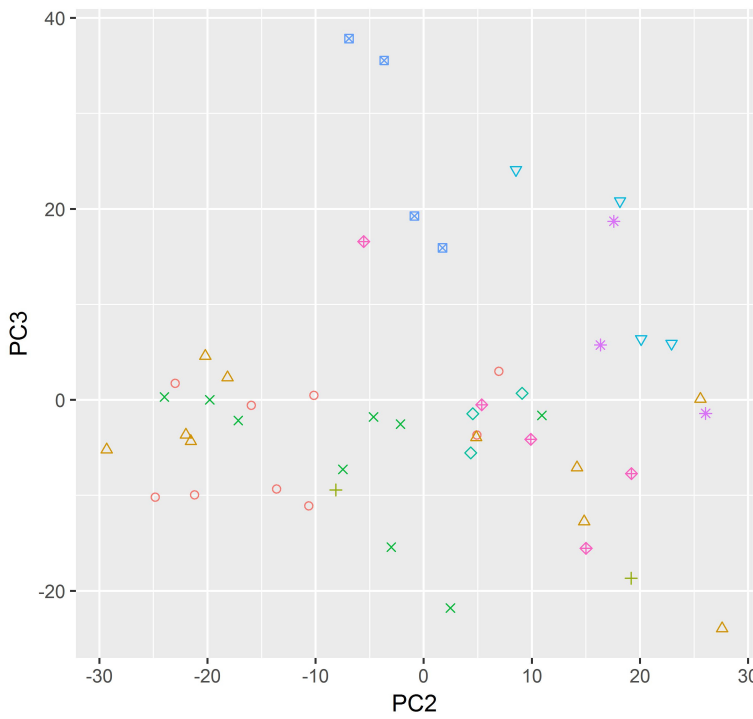

- sentrix\_7959804031
- △ sentrix\_7959804032
- + sentrix\_7959804046
- × sentrix\_7959804067
- ◇ sentrix\_7959804112
- ▽ sentrix\_8942342087
- ⊠ sentrix\_8942342111
- \* sentrix\_8942351095
- ⋄ sentrix\_8942351168
