# Supplementary material for: DNA methylation profiling allows for characterization of atrial and ventricular cardiac tissues and hiPSC-CMs
Source: PubMed Central journal article supplement (PMC6560887; doi:10.1186/s13148-019-0679-0), 2019-06-11
Supplement: 13148_2019_679_MOESM3_ESM.pdf [file 13148_2019_679_MOESM3_ESM.pdf]

Sample 0117

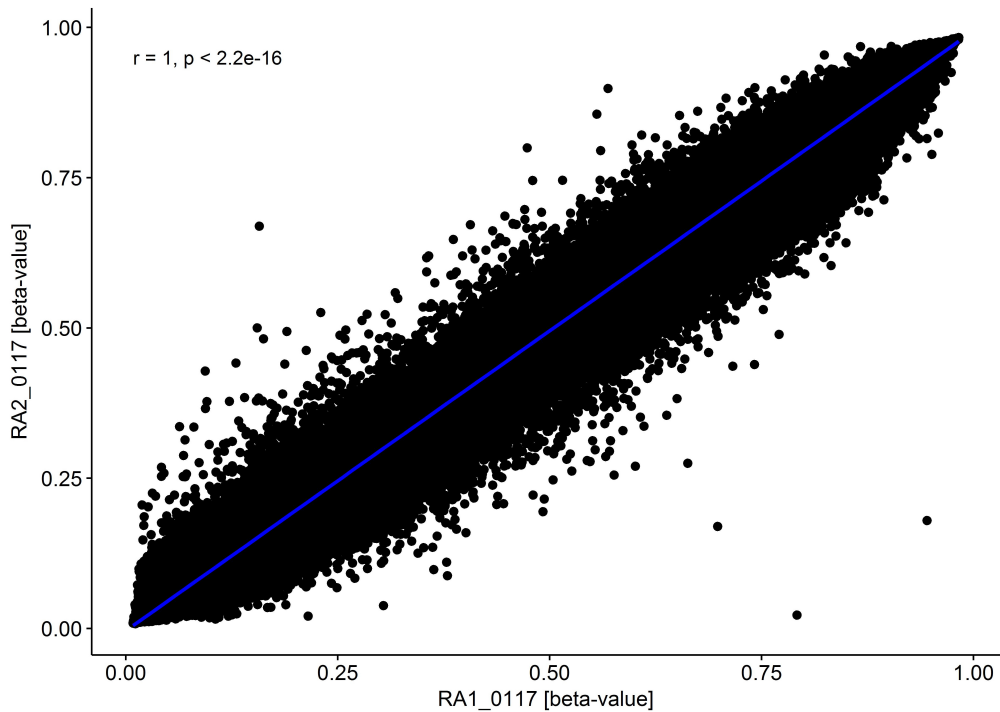

Sample 0126

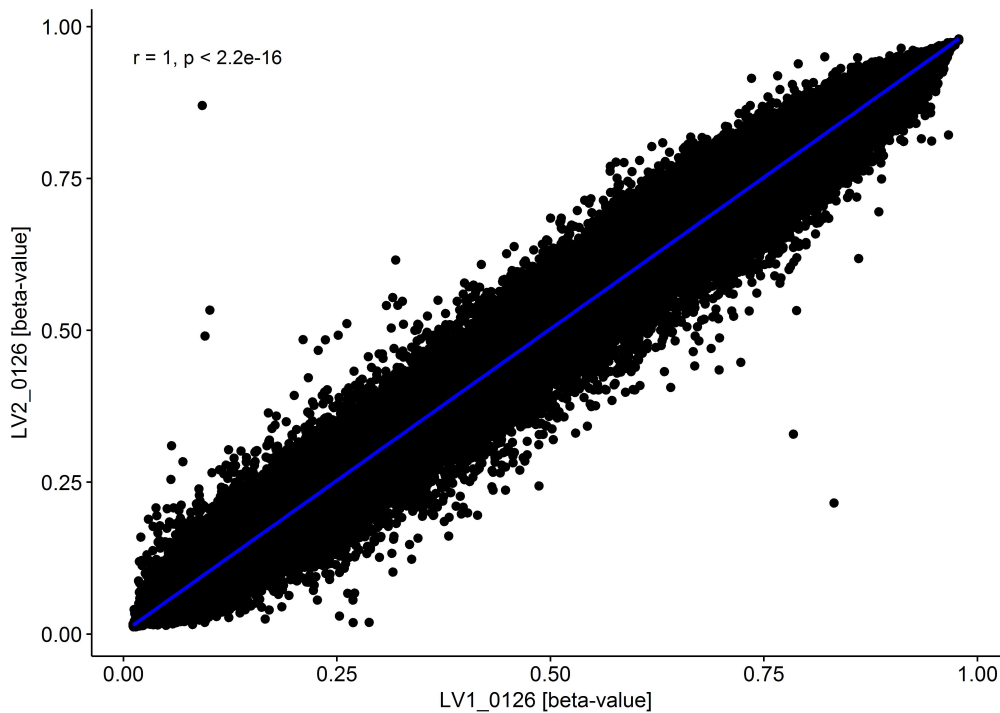

| Sample ID | Regression Analysis [tissue x vs. tissue y] | R <sup>2</sup> -value |
|-----------|---------------------------------------------|-----------------------|
| 0117      | LV1 - LV2                                   | 0.9970855             |
|           | LV1 - LV3                                   | 0.9959226             |
|           | LV2 - LV3                                   | 0.9972144             |
|           | RV1 - RV2                                   | 0.9961868             |
|           | RV1 - RV3                                   | 0.9969996             |
|           | RV2 - RV3                                   | 0.9950241             |
|           | LA1 - LA2                                   | 0.9908811             |
|           | LA1 - LA3                                   | 0.9941115             |
|           | LA2 - LA3                                   | 0.997572              |
|           | RA1 - RA2                                   | 0.9971142             |
|           | RA1 - RA3                                   | 0.9970153             |
| RA2 - RA3 | 0.9985258                                   |                       |
| 0126      | LV1 - LV2                                   | 0.9977693             |
|           | LV1 - LV3                                   | 0.9972465             |
|           | LV2 - LV3                                   | 0.9975448             |
|           | RV1 - RV2                                   | 0.9962584             |
|           | LA1 - LA2                                   | 0.9975677             |
|           | LA1 - LA3                                   | 0.9976382             |
|           | LA2 - LA3                                   | 0.9977372             |
|           | RA1 - RA2                                   | 0.9977619             |
|           | RA1 - RA3                                   | 0.9974826             |
| RA2 - RA3 | 0.9978541                                   |                       |
