# Supplementary material for: DNA methylation profiling allows for characterization of atrial and ventricular cardiac tissues and hiPSC-CMs
Source: PubMed Central journal article supplement (PMC6560887; doi:10.1186/s13148-019-0679-0), 2019-06-11

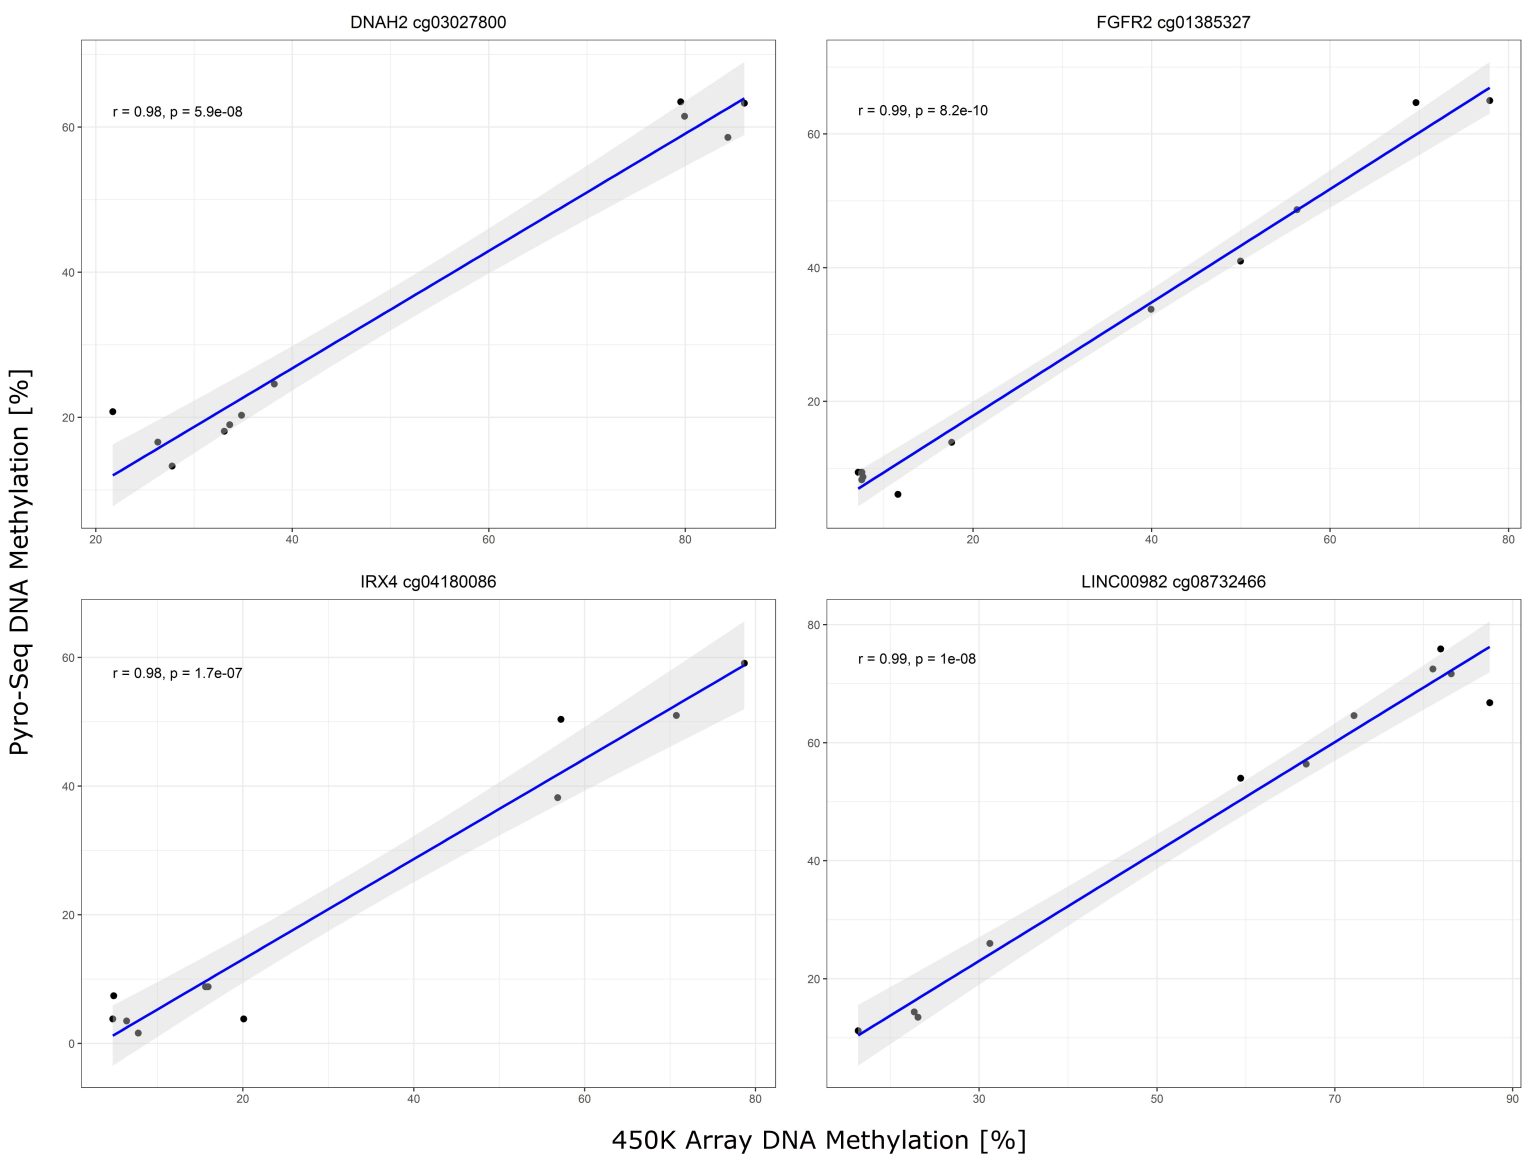

Supplement: 13148_2019_679_MOESM9_ESM.pdf [file 13148_2019_679_MOESM9_ESM.pdf]
