# Supplementary material for: DNA methylation profiling allows for characterization of atrial and ventricular cardiac tissues and hiPSC-CMs
Source: PubMed Central journal article supplement (PMC6560887; doi:10.1186/s13148-019-0679-0), 2019-06-11
Supplement: 13148_2019_679_MOESM11_ESM.pdf [file 13148_2019_679_MOESM11_ESM.pdf]

Pyro-Seq DNA Methylation [%]

NR2F1-AS1 cg04541368

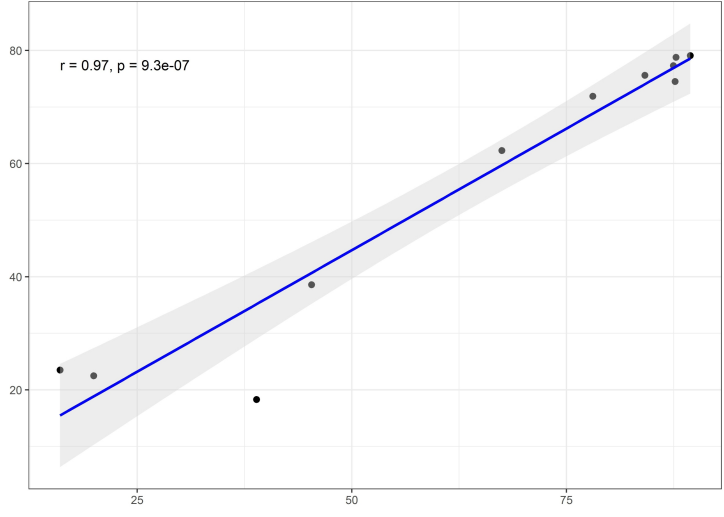

PDE8B cg11062417

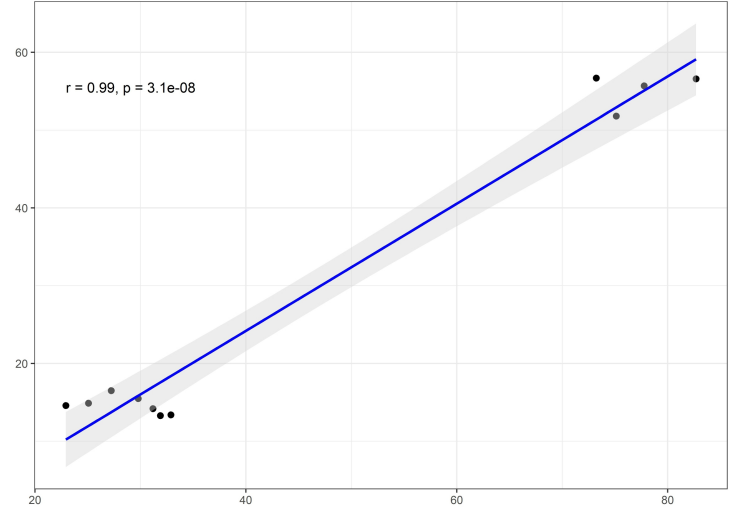

TRAPPC9 cg12865888

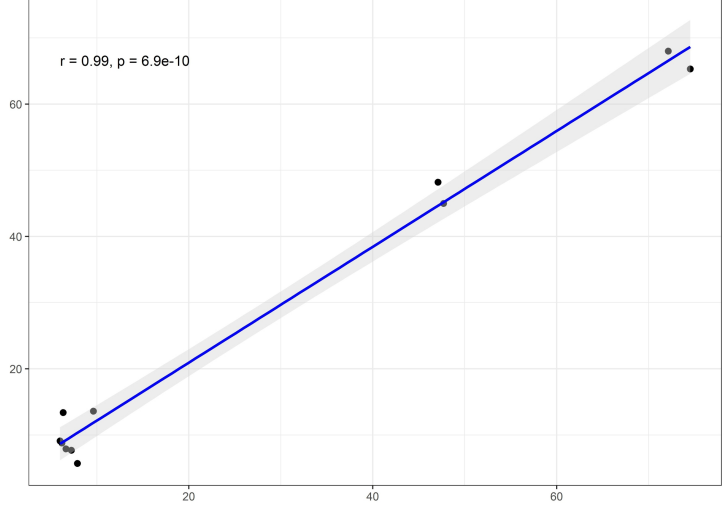

WISP1 cg04683149

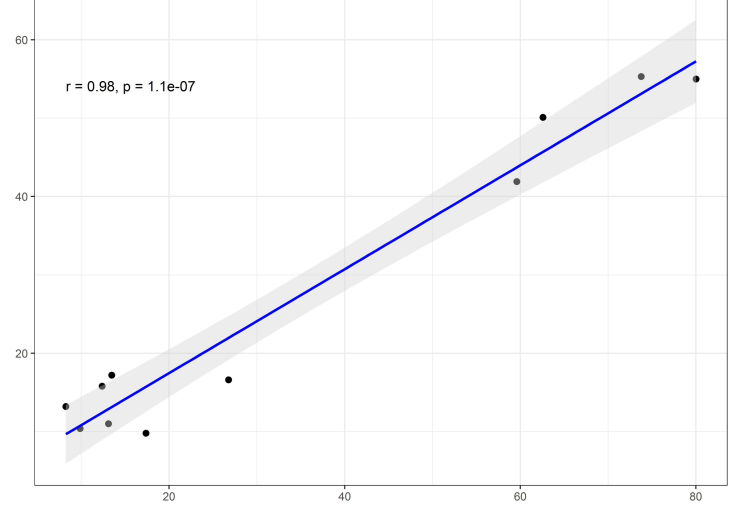

450K Array DNA Methylation [%]
